# Supplementary material for: Injury and illness definitions and data collection procedures for use in epidemiological studies in Athletics (track and field): Consensus statement
Source: HighWire-hosted journal article supplement (doi:10.1136/bjsports-2013-093241), 2014-03-11
Supplement: bjsports-2013-093241supp.pdf [file bjsports-2013-093241supp.pdf]

## Online text supplement 1

Consensus statement on injury and illness definitions and data collection procedures for use in epidemiological studies in Athletics (track and field).

### LIST OF PARTICIPANTS AND OBJECTIONS TO FINAL TEXT

|                    |                                                                          |
|--------------------|--------------------------------------------------------------------------|
| Toomas Timpka      | No objection                                                             |
| Juan-Manuel Alonso | No objection                                                             |
| Jenny Jacobson     | No objection                                                             |
| Astrid Junge       | No objection                                                             |
| Pedro Branco       | No objection                                                             |
| Ben Clarsen        | Disagreement with “mode of onset” and “recurrent conditions” definitions |
| Jan Kowalski       | No objection                                                             |
| Margo Mountjoy     | No objection                                                             |
| Sverker Nilsson    | No objection                                                             |
| Babette Pluim      | No objection                                                             |
| Per Renstrom       | No objection                                                             |
| Ola Ronsen         | No objection                                                             |
| Kathrin Steffen    | No objection                                                             |
| Pascal Edouard     | No objection                                                             |
